# 1 **Title:** The dual nature of metacommunity variability

2 **Running head:** Metacommunity variability

3 **Authors:** Thomas Lamy<sup>1,2</sup>, Nathan I. Wisnoski<sup>3,4</sup>, Riley Andrade<sup>5,6</sup>, Max C.N. Castorani<sup>7</sup>, Aldo  
4 Compagnoni<sup>8,9</sup>, Nina Lany<sup>10,11</sup>, Luca Marazzi<sup>12</sup>, Sydne Record<sup>13</sup>, Christopher M. Swan<sup>14</sup>,  
5 Jonathan D. Tonkin<sup>15,16</sup>, Nicole Voelker<sup>14</sup>, Shaopeng Wang<sup>17</sup>, Phoebe L. Zarnetske<sup>11,18</sup>, and Eric  
6 R. Sokol<sup>19,20</sup>

## 7 **Affiliations:**

8 (1) Marine Science Institute, University of California, Santa Barbara, CA 93106, USA (2)  
9 MARBEC, University of Montpellier, CNRS, Ifremer, IRD, Sète, France (3) Department of  
10 Biology, Indiana University, Bloomington, IN 47405 USA (4) WyGIS, University of  
11 Wyoming, Laramie, WY 82071, USA (5) School of Geographical Sciences and Urban Planning,  
12 Arizona State University, Tempe, AZ 85281, USA (6) Department of Natural Resources &  
13 Environmental Sciences, University of Illinois at Urbana – Champaign, Urbana, IL 61801, USA  
14 (7) Department of Environmental Sciences, University of Virginia, Charlottesville, VA 22904  
15 USA (8) Martin Luther University Halle-Wittenberg, Am Kirchtor 1, 06108, Halle (Saale),  
16 Germany (9) German Centre for Integrative Biodiversity Research (iDiv) Halle-Jena-Leipzig,  
17 Puschstrasse 4, Leipzig 04103, Germany (10) Department of Forestry, Michigan State  
18 University, East Lansing, MI 48824, USA (11) Ecology, Evolution, and Behavior Program,  
19 Michigan State University, East Lansing, MI 48824, USA (12) Institute of Environment, Florida  
20 International University, Miami, FL 33199, USA (13) Department of Biology, Bryn Mawr  
21 College, Bryn Mawr, PA 19010, USA (14) Department of Geography & Environmental Systems,  
22 University of Maryland, Baltimore County, Baltimore, MD 21250, USA (15) Department of  
23 Integrative Biology, Oregon State University, OR 97331, USA (16) School of Biological  
24 Sciences, University of Canterbury, Christchurch 8140, New Zealand (17) Key Laboratory for  
25 Earth Surface Processes of the Ministry of Education, Institute of Ecology, College of Urban and  
26 Environmental Sciences, Peking University, Beijing, China (18) Department of Integrative  
27 Biology, Michigan State University, East Lansing, MI 48824, USA (19) Institute of Arctic and  
28 Alpine Research (INSTAAR), University of Colorado Boulder, USA (20) Battelle, National  
29 Ecological Observatory Network (NEON), Boulder, CO 80301 USA

30

## 31 **E-mails address of all authors:**

32 Thomas Lamy: [thomas.lamy27@gmail.com](mailto:thomas.lamy27@gmail.com); [orcid.org/0000-0002-7881-0578](https://orcid.org/0000-0002-7881-0578)  
33 Nathan I. Wisnoski: [nathan.wisnoski@uwyo.edu](mailto:nathan.wisnoski@uwyo.edu); [orcid.org/0000-0002-2929-5231](https://orcid.org/0000-0002-2929-5231)  
34 Riley Andrade: [riley.m.andrade@gmail.com](mailto:riley.m.andrade@gmail.com); [orcid.org/0000-0003-3640-6013](https://orcid.org/0000-0003-3640-6013)  
35 Max C.N. Castorani: [castorani@virginia.edu](mailto:castorani@virginia.edu); [orcid.org/0000-0002-7372-9359](https://orcid.org/0000-0002-7372-9359)  
36 Aldo Compagnoni: [aldo.compagnoni@idiv.de](mailto:aldo.compagnoni@idiv.de); [orcid.org/0000-0001-8302-7492](https://orcid.org/0000-0001-8302-7492)  
37 Nina Lany: [nina.k.lany@gmail.com](mailto:nina.k.lany@gmail.com); [orcid.org/0000-0003-0868-266X](https://orcid.org/0000-0003-0868-266X)  
38 Luca Marazzi: [lucamarazzi78@gmail.com](mailto:lucamarazzi78@gmail.com); [orcid.org/0000-0002-3098-7059](https://orcid.org/0000-0002-3098-7059)  
39 Sydne Record: [srecord@brynmaur.edu](mailto:srecord@brynmaur.edu); <https://orcid.org/0000-0001-7293-2155>  
40 Christopher Swan: [chris.swan@umbc.edu](mailto:chris.swan@umbc.edu), [orcid.org/0000-0002-9763-9630](https://orcid.org/0000-0002-9763-9630)  
41 Jonathan D. Tonkin: [jonathan.tonkin@canterbury.ac.nz](mailto:jonathan.tonkin@canterbury.ac.nz); [orcid.org/0000-0002-6053-291X](https://orcid.org/0000-0002-6053-291X)  
42 Shaopeng Wang: [shaopeng.wang@pku.edu.cn](mailto:shaopeng.wang@pku.edu.cn)

43 Nicole Voelker: [nvoelker1@gmail.com](mailto:nvoelker1@gmail.com)  
44 Phoebe L. Zarnetske: [plz@msu.edu](mailto:plz@msu.edu); [orcid.org/0000-0001-6257-6951](https://orcid.org/0000-0001-6257-6951)  
45 Eric R. Sokol: [sokole@gmail.com](mailto:sokole@gmail.com); [orcid.org/0000-0001-5923-0917](https://orcid.org/0000-0001-5923-0917)

46

## 47 Abstract

48 It is well recognized that within local communities, fluctuations of constituent species over time  
49 can alter both aggregate (e.g., total abundance or biomass) and compositional community  
50 properties. At broader spatial scales, recent evidence shows how spatial asynchrony can further  
51 stabilize aggregate properties at the regional, or metacommunity, scale. Yet, apparent lack of  
52 variability in aggregate metacommunity properties can mask changes in metacommunity  
53 composition, and a framework acknowledging such dual nature of metacommunity variability is  
54 still lacking. Here, we present an approach to characterize metacommunity variability that  
55 integrates both aggregate and compositional properties. We demonstrate that the compositional  
56 variability of a metacommunity critically depends on the degree of spatial synchrony in the  
57 compositional trajectories over time among local communities. We develop two methods,  
58 available in the *lrmc* R package, to quantify such spatial compositional synchrony and apply  
59 them to a case study of understory macroalgal communities inhabiting shallow rocky reefs off  
60 the coast of Santa Barbara, California. We found that moderate spatial asynchrony reduced  
61 variability in aggregate metacommunity biomass, whilst masking synchronous, and potentially  
62 destabilizing, compositional variability at the metacommunity scale. These results highlight the  
63 need to consider both aspects of metacommunity variability simultaneously in order to fully  
64 understand variability over broad spatial scales.

65  
66 **Keywords:** biodiversity, metacommunity, scale, stability, variability, long-term ecological  
67 research.

68  
69

## 70 Introduction

71 Understanding the processes that influence the temporal variability of ecological communities is  
72 a fundamental aim of ecology (MacArthur 1955, May 1973, Grimm and Wissel 1997, Ives and  
73 Carpenter 2007). Decades of study have identified several important factors that can stabilize  
74 aggregate properties (e.g., total abundance or biomass) of local communities, such as dampened  
75 population fluctuations and compensatory dynamics among species (Tilman 1999, Yachi and  
76 Loreau 1999, Gonzalez and Loreau 2009, Brown et al. 2016). However, local communities do  
77 not exist in isolation; they are connected across space via the dispersal of constituent species to  
78 form metacommunities. This connectivity reflects important processes acting across spatial  
79 scales that ultimately determine variability of the aggregate properties at the metacommunity  
80 scale (Leibold et al. 2004, Leibold and Chase 2018). Understanding variability at the  
81 metacommunity scale is particularly important for managing complex landscapes in the context  
82 of current environmental changes.

83 Recent theoretical (Wang and Loreau 2014, 2016) and empirical (Wilcox et al. 2017,  
84 Wang et al. 2017, 2019) contributions have shown that aggregate community variability  
85 decreases with increasing spatial scale, depending on the degree of spatial synchrony. Aggregate  
86 community variability at the regional scale, quantified as the square of the coefficient of  
87 variation of aggregate metacommunity property ( $CV_Y^2$ ), can be multiplicatively partitioned as  
88  $CV_Y^2 = CV_\alpha^2 \times \phi$  (see equations in Table 2; Wang and Loreau 2014). Here,  $CV_\alpha^2$  is the average

89 local aggregate community variability and  $\varphi$  is the spatial aggregate synchrony, which serves as  
90 a scaling factor for aggregate community variability from local to regional scales.  $\varphi$  ranges  
91 between zero and one, with higher  $\varphi$  indicating more spatially synchronous fluctuations in the  
92 aggregate community property among local communities. Values of  $\varphi$  close to zero indicate that  
93 local communities fluctuate in such a way that aggregate metacommunity variability is null. A  
94 low degree of spatial aggregate synchrony across local communities reduces the variability of an  
95 aggregate property at the metacommunity scale (hereafter, ‘aggregate metacommunity  
96 variability’), which provides spatial insurance effects (Loreau et al. 2003, Wang and Loreau  
97 2014, 2016). For example, if the total biomass of two local communities fluctuate in perfect  
98 asynchrony, these fluctuations cancel each other out, resulting in no variability in  
99 metacommunity biomass through time (Figure 1).

100 However, fluctuations in an aggregate property at the metacommunity scale represents  
101 only one facet of temporal metacommunity variability (*sensu* Micheli et al. 1999). A second  
102 facet is ‘compositional metacommunity variability’, which is the temporal variability in species  
103 composition at the metacommunity scale. Temporal fluctuations in aggregate metacommunity  
104 properties can arise with or without corresponding fluctuations in compositional metacommunity  
105 variability (Figure 1A vs. 1B). Similarly, a lack of aggregate metacommunity variability can  
106 mask important temporal changes in the composition and relative abundance of the species that  
107 comprise the metacommunity. For instance, a spatial insurance effect can stabilize total biomass  
108 of the metacommunity due to spatially asynchronous fluctuations among local communities (i.e.,  
109 low aggregate metacommunity variability; Figure 1C). However, if one species becomes  
110 dominant over time at the metacommunity scale, this compositional change could remain  
111 undetected with aggregate properties (Figure 1D), which however has important implications for  
112 the maintenance of biodiversity at large spatial scales.

113 There have been few empirical investigations of the mechanisms that influence the  
114 degree of variability across scales (e.g., Wilcox et al. 2017), partly due to a lack of theoretical  
115 development and long-term, large-scale community datasets (Oliver et al. 2010, Donohue et al.  
116 2013, Wang and Loreau 2014, 2016). To address these gaps, we provide a conceptual and  
117 methodological framework to apply measures of compositional variability at the metacommunity  
118 scale. These measures can be implemented in the *ltmc* package for R (available at  
119 <https://github.com/sokole/ltmetacommunities/tree/master/ltmc>). We then use long-term data  
120 from kelp forest communities in the Santa Barbara Channel off the coast of California, USA, to  
121 empirically demonstrate the dual nature of metacommunity variability—compositional and  
122 aggregate. Lastly, we discuss this dual nature in light of dispersal, environmental heterogeneity,  
123 and species interactions, shedding new light on the processes that promote the resilience of  
124 ecosystems across spatial scales.

## 125 **Incorporating composition into temporal metacommunity** 126 **variability**

127 Compositional differences in community structure have been studied extensively in a spatial  
128 context (e.g., beta diversity and community assembly) (Chase 2010, Anderson et al. 2011), but  
129 much less attention has been given to how these properties vary over time (Adler et al. 2005,  
130 Magurran et al. 2018, De Cáceres et al. 2019). A common approach to assess variation in species  
131 composition among samples collected across space is to measure beta diversity (Tuomisto

132 2010a, b, Anderson et al. 2011, Legendre and De Cáceres 2013). Beta diversity metrics have also  
133 been used to quantify compositional variability through time (e.g., Hillebrand et al. 2010, De  
134 Cáceres et al. 2019, Legendre 2019), but there is currently no framework to understand how  
135 temporal compositional variability scales with space. Although beta diversity can be assessed  
136 based on any pairwise dissimilarity index (Anderson et al. 2011, Legendre and Legendre 2012),  
137 many of these indices depend on differences in aggregate properties, such as total community  
138 biomass, across samples (Legendre 2014, but see Lamy et al. 2015). To ensure that measures of  
139 compositional variability can reveal new insights that are not already captured in aggregate  
140 variability, quantification of compositional variability in the metacommunity context should be  
141 based on indices that rely on species' relative frequencies (of biomass or abundance for  
142 instance). Three pairwise dissimilarity indices fulfill this "density invariance" property (Jost et  
143 al. 2011): Whittaker's index of association (Whittaker 1952), the Chord distance (Orlaci 1967)  
144 and the Hellinger distance (Rao 1995). Here, we discuss the Hellinger distance and a new time-  
145 independent Hellinger normalization to measure compositional variability across space.

## 146 **Quantifying temporal compositional variability**

147 The compositional variability (Table 1 and 2) of a single local community  $i$  composed of  $s$   
148 species surveyed  $n$  times can be computed as beta diversity (BD) under the variance framework  
149 of Legendre and De Cáceres (2013). In this framework, the compositional variability of local  
150 community  $i$  represents the total variance in species composition observed over time and is  
151 computed as:

$$BD_i = SST_i / (n - 1) \quad \#(1)$$

152 where  $SST_i$  is the total sum of squares in species composition,  $SST_i = \sum_j \sum_t^n (X_{itj} - \bar{X}_{i,j})^2$ , with  
153  $(X_{itj} - \bar{X}_{i,j})^2$  the square of the difference between the biomass of species  $j$  at time  $t$ , and the  
154 temporal mean biomass of species  $j$  ( $\bar{X}_{i,j} = \sum_t^n X_{itj} / n$ ). This definition of BD corresponds to the  
155 Euclidean distance, which was shown to be inappropriate for beta diversity assessment (Wolda  
156 1981, Legendre and Gallagher 2001) and does not fulfill the density invariance property,  
157 described previously (Jost et al. 2011). To make this measure appropriate for calculating  
158 compositional variability, we compute a value of  $SST$  corresponding to the Hellinger distance by  
159 computing the Hellinger transformation on the original data (Table 2). Compositional variability  
160 based on the Hellinger transformation ( $BD^h$ ; where  $h$  stands from Hellinger) is calculated from  
161 the square root of species relative frequencies and provides a measure of compositional  
162 variability that is independent from the differences in aggregate community property (Table 2).  
163 Compositional variability of local community  $i$  based on the Hellinger distance is:

$$BD_i^h = \sum_j^s v_{ij}^h \quad \#(2)$$

164 where  $v_{ij}^h = \frac{\sum_t^n (X_{itj}^h - \bar{X}_{i,j}^h)^2}{n-1}$  is the temporal variance of the Hellinger-transformed biomass of  
165 species  $j$  in the local community  $i$ . Here,  $X_{itj}^h$  represents the Hellinger transformation of the  
166 biomass, or abundance, of species  $j$  in community  $i$  at time  $t$  (Table 2). Greater sums of species  
167 variances ( $v_{ij}^h$ ) lead to greater compositional variability ( $BD_i^h$ ). The advantage of  $BD_i^h$  is that it is  
168 comparable among taxonomic groups because it ranges between zero, when species composition  
169 is constant over time, and one, when species composition is unique at each time point (Legendre  
170 and De Cáceres 2013).

171 However, using  $BD_i^h$  to understand compositional variability across space has one  
172 particular limitation. It yields a spatial compositional synchrony metric that does not truly behave  
173 as its aggregate counterpart  $\varphi$  (*i.e.* ranging from zero to one) as  $BD_i^h$  does not necessarily  
174 decrease with increasing spatial scale (whereas aggregate variability always does so). Therefore,  
175 we derive a new compositional variability metric that is more appropriate when dealing with  
176 multiple spatial scales as it will yields a synchrony metric ranging from zero to one. This metric  
177 corresponds to a time-independent version of the Hellinger transformation ( $BD_i^{hT}$ ; where  $hT$   
178 stands from Hellinger time-independent). Our modified Hellinger transformation represents a  
179 time-independent normalization of the original data. That is, species' frequencies are computed  
180 relative to total biomass within a community across all time steps:

$$X_{itj}^{hT} = \sqrt{X_{itj}/X_{i..}} \#(3)$$

181 Where  $X_{itj}$  is the biomass of species  $j$  at time  $t$  in local community  $i$ , and  $X_{i..}$  corresponds to the  
182 total community biomass observed across all time steps in local community  $i$  ( $X_{i..} = \sum_j^s \sum_t^n X_{itj}$ ).  
183 Instead of normalizing the biomass of each species by the total community biomass observed at  
184 each time step, we normalize species biomass by the total community biomass observed across  
185 all time steps in a given local community. Compositional variability based on the time-  
186 independent Hellinger transformation of a local community  $i$  is:

$$BD_i^{hT} = \frac{\sum_j^s v_{ij}^{hT}}{X_{i..}} \#(4)$$

187 where  $v_{ij}^{hT} = \frac{\sum_t^n (\sqrt{X_{itj}} - \sqrt{X_{i..}})^2}{n-1}$  is the temporal variance of the square root coefficient biomass of  
188 species  $j$  in local community  $i$ . Contrary to  $BD_i^h$ , the time-independent measure of compositional  
189 variability,  $BD_i^{hT}$ , can exceed one but it always scales negatively with space.

190 To summarize, direct interpretation of local and regional scale Hellinger-transformed  
191 compositional variability,  $BD_i^h$ , can be more intuitive, but this metric does not scale negatively  
192 with space and therefore the resulting synchrony metric does not lie between zero and one. On  
193 the contrary, the interpretation of local and regional scale *time-independent* Hellinger-  
194 transformed compositional variability,  $BD_i^{hT}$  always scales negatively with space and therefore  
195 yields a more realistic synchrony metric. In the next section we show how  $BD_i^{hT}$  can be used to  
196 link compositional variability across spatial scales. In the supplementary material we show a  
197 similar computation for  $BD_i^h$ . Both metrics can be calculated using the 'temporal\_BD' function  
198 in the *ltmc* (long-term metacommunity analysis) package for R (available at  
199 <https://github.com/sokole/ltermetacommunities/tree/master/ltmc>).

## 200 **Linking aggregate and compositional variability across** 201 **spatial scales**

202 Both aggregate and compositional variability measured over a large spatial extent ( $\gamma$  variability)  
203 can be hierarchically partitioned in a multiplicative way into a local-scale ( $\alpha$ ) variability and a  
204 spatial component ( $\varphi$ ). The spatial component ( $\varphi$ ) corresponds to the spatial aggregate  
205 synchrony and the spatial compositional synchrony that quantify how aggregate and  
206 compositional variability, respectively, scale up from the local to the metacommunity scale. The  
207 partitioning of both aggregate and compositional community variability can be easily applied to

208 a wide variety of ecosystems surveyed through both space and time, and we provide R functions  
 209 in the *ltmc* package for R to facilitate its application.

210 For a given metacommunity, we assume each local community is sampled in a similar  
 211 way, such that  $m$  local communities (or sites) are sampled over  $n$  time steps. During each survey,  
 212 the total abundance or biomass of  $s$  species is recorded (for clarity we will use biomass as an  
 213 example hereafter). Hence, data can be summarized as a community array  $\mathbf{X}$ , where  $X_{itj}$   
 214 represents the abundance or biomass of species  $j$  in community  $i$  at time  $t$ . The aggregate  
 215 community metric (total community biomass) is obtained by summing the values of these  
 216 variables across the  $s$  species. The metacommunity corresponds to the largest spatial scale and is  
 217 defined by summing the values of the aggregated community metric across the  $m$  local  
 218 communities (Table 1). This will produce a vector of length  $n$  for the aggregate metacommunity  
 219 metric (total metacommunity biomass), and a  $n \times s$  time-by-species matrix containing the  
 220 biomass of each species over time at the regional scale. We have already discussed the  
 221 multiplicative relationship between local- and regional-scale aggregate variability ( $CV_\alpha^2$  and  $CV_\gamma^2$ ,  
 222 respectively; Table 2), and we will now demonstrate the multiplicative relationship between  
 223 local- and regional-scale compositional variability ( $BD_\alpha$  and  $BD_\gamma$ , respectively).

## 224 Local scale compositional variability

225 Mean local scale compositional variability is computed as the weighted average of compositional  
 226 variability across the  $m$  local communities calculated using  $BD_i^{hT}$  (see SM1 for  $BD_i^h$ ), the time-  
 227 independent Hellinger transformation:

$$BD_\alpha^{hT} = \sum_i \frac{X_{i..}}{X_{...}} BD_i^{hT} = \frac{\sum_i^m \sum_j^s v_{ij}^{hT}}{X_{...}} \#(5)$$

228 with  $\frac{X_{i..}}{X_{...}}$  the weight of local community  $i$ . Local communities are weighted by their contributions  
 229 to the overall metacommunity biomass with  $X_{...} = \sum_i^m \sum_t^n \sum_j^s X_{itj}$  and  $X_{i..} = \sum_t^n \sum_j^s X_{itj}$ . In eq. 5,  
 230  $v_{ij}^{hT}$  represents the temporal variance of the square root coefficient of abundance (or biomass) of  
 231 species  $j$  in local community  $i$ .

## 232 Regional scale compositional variability

233 We define the regional scale compositional variability based on the time-independent Hellinger  
 234 transformation (see SM1 for  $BD_\gamma^h$ ) as:

$$BD_\gamma^{hT} = \frac{\sum_j^s \sum_t^n (X_{.tj}^{hT} - \bar{X}_{.j}^{hT})^2}{(n-1)} = \frac{\sum_j^s v_{Tj}^{hT}}{X_{...}} \#(6)$$

235 where  $X_{.tj}^{hT} = \sqrt{\sum_i^m X_{itj}/X_{...}}$  is the square root of the regional frequency of species  $j$  relative to  
 236 the total metacommunity biomass, and  $\bar{X}_{.j}^{hT} = \frac{\sum_t^n X_{.tj}^{hT}}{n}$ , is the temporal mean of the square root of  
 237 the frequencies of species  $j$  in the regional pool relative to total metacommunity biomass, and  
 238  $v_{Tj}^{hT} = \frac{\sum_t^n (\sqrt{X_{.tj}} - \sqrt{\bar{X}_{.j}})^2}{n-1}$  is the temporal variance of the square root of the regional biomass of  
 239 species  $j$ . Thus, greater variability of individual species biomasses at the regional scale,

240 regardless of spatial location, contributes to greater regional scale compositional variability (i.e.,  
241 larger values of  $BD_\gamma^{hT}$ ).

## 242 Linking compositional variability across multiple spatial scales: the 243 spatial asynchrony components

244 Similar to aggregate variability (see Introduction), we propose that compositional variability at  
245 the regional scale ( $BD_\gamma$ ) can be partitioned multiplicatively into a local scale ( $BD_\alpha$ ) and a spatial  
246 component ( $BD_\phi$ ) as  $BD_\gamma = BD_\alpha \times BD_\phi$ . Spatial compositional synchrony,  $BD_\phi$ , reflects how  
247 compositional variability scales up from the local to the regional scale.  $BD_\phi$  increases as  
248 temporal compositional changes become more spatially synchronous among local communities.  
249 The time-independent Hellinger transformation yields the relationship  $BD_\gamma^{hT} = BD_\alpha^{hT} \times BD_\phi^{hT}$ ,  
250 with  $BD_\phi^{hT}$  the spatial component (see SM1 for details about  $BD_\phi^h$ ). First,  $BD_\phi^{hT}$  can be rewritten  
251 as:

$$BD_\phi^{hT} = \frac{BD_\gamma^{hT}}{BD_\alpha^{hT}} = \frac{\sum_j v_{Tj}^{hT}}{\sum_i^m \sum_j^s v_{ij}^{hT}} \#(7)$$

252 by substituting the equations for  $BD_\alpha^{hT}$  and  $BD_\gamma^{hT}$  given above. Next, we define the spatial  
253 synchrony of species  $j$  ( $\phi_{(j)}^{hT}$ ) as the ratio between its temporal variance in square root biomass at  
254 the regional scale ( $v_{Tj}^{hT}$ ) and the sum across all patches of its local temporal variance in square  
255 root biomass ( $\sum_i^m v_{ij}^{hT}$ ), which yields:

$$\phi_{(j)}^{hT} = \frac{v_{Tj}^{hT}}{\sum_i^m v_{ij}^{hT}} \#(8)$$

256 By substituting this species-specific spatial synchrony index ( $\phi_{(j)}^{hT}$ ) into the measure of spatial  
257 compositional synchrony ( $BD_\phi^{hT}$ ), we obtain:

$$BD_\phi^{hT} = \frac{\sum_j \sum_i^m v_{ij}^{hT} \cdot \phi_{(j)}^{hT}}{\sum_i^m \sum_j^s v_{ij}^{hT}} = \sum_j^s \frac{\sum_i^m v_{ij}^{hT}}{\sum_i^m \sum_j^s v_{ij}^{hT}} \cdot \phi_{(j)}^{hT} = \sum_j^s w_j \cdot \phi_{(j)}^{hT} \#(9)$$

258 with  $w_j = \sum_i^m v_{ij}^{hT} / \sum_j^s \sum_i^m v_{ij}^{hT}$  representing a weighting term for each species. Therefore, our  
259 suggested definition of spatial compositional synchrony,  $BD_\phi^{hT}$ , corresponds to the weighted  
260 average of species-level spatial synchrony ranging between the minimum and maximum  $\phi_{(j)}^{hT}$   
261 observed in the metacommunity.

262 Both the aggregate and compositional variability metrics and their respective scaling  
263 coefficients described here can be calculated using the *metacommunity\_variability* function in  
264 the *lrmc* package for R. See supplemental material SM2 for an example.

265 Our species-specific metric of spatial synchrony,  $\phi_{(j)}^{hT}$ , ranges between zero and one.  
266 However, it differs from the classic definition of Loreau and de Mazancourt (2008), which takes  
267 the form  $v_x / (\sum \sqrt{v_x})^2$ , that is used to define spatial aggregate synchrony (Wang and Loreau  
268 2014). A notable difference is that species biomasses are square-root transformed before  
269 computing their temporal variances in the case of our new metric. The denominator of  $\phi_{(j)}^{hT}$ ,  
270  $\sum_{i=1}^m v_{ij}^{hT}$ , corresponds to the sum across all local populations of the temporal variances of square  
271 root biomass of species  $j$ , and the numerator,  $v_{Tj}^{hT}$  corresponds to the temporal variance of the



272 square root of its summed biomass across all local communities. Wang et al. (2019) provided an  
273 integrative framework in which metacommunity variability can be expressed as the product of  
274 local-scale population variability and two synchrony indices. Metacommunity variability can be  
275 partitioned in two ways, either (i) from individual local populations to local communities and  
276 from local communities to the metacommunity or (ii) from individual local populations to  
277 metapopulations and from metapopulations to the metacommunity (Wang et al. 2019). Here,  
278  $BD_{\phi}^{hT}$ , represents an integrative measure of synchrony that directly scales individual local  
279 populations to the metacommunity.

280 The quantitative partitioning of variability into local-scale ( $\alpha$ ), regional-scale ( $\gamma$ ), and  
281 spatial ( $\phi$ ) components of aggregate and compositional variability suggests the existence of a  
282 common currency to investigate metacommunity stability. Notably,  $\phi$  and  $BD_{\phi}^{hT}$  are essential  
283 components to understand the spatial insurance of natural communities. Both aggregate and  
284 compositional variability may be highly variable at the local scale, but a strong spatial insurance  
285 effects may dampen these fluctuations at the regional level (e.g., Figure 1D).

## 286 **Illustrating the dual nature of metacommunity variability: a** 287 **case study**

288 We used a case study of understory macroalgal communities inhabiting shallow rocky reefs off  
289 the coast of Santa Barbara, California, USA to illustrate the dual nature of metacommunity  
290 variability. These data were collected as part of the Santa Barbara Coastal Long Term Ecological  
291 Research program (<http://sbc.lternet.edu>; Reed 2018) and are publicly available on the EDI data  
292 portal (<https://doi.org/10.6073/pasta/d5fd133eb2fd5bea885577caaf433b30>). We focused on 14-  
293 year time series (2004–2017) of species-specific biomass of 53 macroalgae surveyed across 10  
294 shallow (4–12 m depth) rocky reefs. Abundance data were measured at 27 fixed 80 m<sup>2</sup> (40 m ×  
295 2m) plots distributed across the 10 rocky reefs, and then converted to biomass density (g  
296 decalcified dry mass m<sup>-2</sup>) using species-specific allometries (Harrer et al. 2013, Reed 2018).  
297 Detailed methods for calculating metacommunity variability can be found in SM2.

298 Consistent with theoretical predictions, local-scale fluctuations in aggregate biomass  
299 ( $CV_{\alpha}^2 = 0.182$ ) were reduced by a factor of ~5.5 at the metacommunity scale ( $CV_{\gamma}^2 = 0.033$ )  
300 (Figure 2C). This reduction in aggregate metacommunity variability occurred due to relatively  
301 low spatial synchrony in total biomass across local communities ( $\phi = 0.182$ ). However,  
302 compositional variability only decreased by a factor of 2 from the local community scale ( $BD_{\alpha}^{hT}$   
303 = 0.019) to the whole metacommunity ( $BD_{\gamma}^{hT} = 0.01$ ). This was due to a higher degree of spatial  
304 compositional synchrony ( $BD_{\phi}^{hT} = 0.498$ ), suggesting that local compositional trajectories were  
305 not spatially independent (Figure 2A). That is, local communities partly followed similar  
306 compositional trajectories over time, which translated to compositional variability at the  
307 metacommunity scale (Figure 2B). This cross-scale comparison of aggregate and compositional  
308 variability suggests that spatial insurance effects were stronger on aggregate variability than  
309 compositional variability.

310 To further investigate compositional variability across spatial scales, we assessed the  
311 temporal compositional dynamics of local communities and of the metacommunity. The  
312 nonmetric multidimensional scaling (NMDS) of Hellinger distances illustrated both substantial  
313 compositional heterogeneity among local communities overall (i.e., spatial beta diversity) and  
314 temporal changes within each local community during the 14-year period (Figure 2D). When

315 visualized along the first two NMDS axes, many local communities had similar community  
316 structure at the beginning of the time series (in the upper left quadrant of the NMDS plot). Over  
317 the next 14 years, local community dynamics were similar across these sites in the  
318 metacommunity, resulting in comparable temporal trajectories along NMDS-axis 2 (ended in the  
319 lower left quadrant of the NMDS). As a result, the overall metacommunity tracked these local  
320 dynamics along NMDS-axis 2, but metacommunity variability was slightly dampened due to  
321 present, but weak, spatial compositional asynchrony.

## 322 **Discussion**

323 Scaling variability from local to regional scales has posed an exciting challenge for ecologists.  
324 With regard to aggregate variability, recent theory (Wang and Loreau 2014, 2016, Wang et al.  
325 2019) have provided the foundation to better understand the factors that contribute to reduced  
326 aggregate metacommunity variability. For instance, spatial insurance effects can reduce  
327 aggregate metacommunity variability of plant assemblages (Wilcox et al. 2017) and higher beta  
328 diversity was linked to a lower degree of spatial aggregate synchrony (Wang et al. 2019, 2021).  
329 As more long-term spatio-temporal surveys become available (Hughes et al. 2017, Record et al.  
330 2021), it will become increasingly feasible to gain new insights into processes suspected of  
331 reducing aggregate variability over broader scales. Yet, such an aggregate perspective overlooks  
332 the compositional component of community dynamics, which characterizes an important  
333 dimension of metacommunity variability (Micheli et al. 1999). The framework presented here  
334 fills this knowledge gap by providing a means to quantify the aggregate and compositional  
335 properties of metacommunity variability.

### 336 **Compositional insight into metacommunity variability**

337 Wang et al. (2019) proposed a framework to partition metacommunity aggregate variability as  
338 the product of local-scale population variability and two synchrony indices that capture the  
339 temporal coherence across species and space. In other words, local-scale population variability  
340 scales up to the metacommunity either through aggregate properties of local communities or  
341 through the metapopulations of constituent species. The framework of Wang et al. (2019) ties  
342 together the variability of local populations, metapopulations, local communities, and the  
343 metacommunity. The metrics of compositional variability and spatial compositional synchrony  
344 we presented here is a more integrative measure that directly quantifies how variability scales  
345 from local-scale populations to the metacommunity directly. It captures the degree of synchrony  
346 in the compositional trajectories of local communities and could provide insights into the  
347 mechanisms that stabilize aggregate properties across scales.

348 High compositional spatial synchrony is not necessarily destabilizing but instead can  
349 provide insight into the stabilizing mechanisms that dampen aggregate metacommunity  
350 variability. For example, in our case study of an understory marine macroalgal metacommunity,  
351 compositional spatial synchrony was higher than its aggregate counterpart (Figure 2C). As a  
352 result, compositional variability of the metacommunity mirrored that of local communities,  
353 which exhibited large compositional shifts that would have been undetected from aggregate  
354 properties alone (Figure 2B). Indeed, this higher compositional spatial synchrony captures the  
355 fact that most local communities underwent similar trajectories, in particular, major declines of  
356 the dominant species that were partly compensated for by the rise of the three sub-dominant

357 species (Lamy et al. 2019). Consequently, the metacommunity underwent a similarly large shift  
358 in composition as the dominant species was replaced by the sub-dominant species (Figure 2B).  
359 Our approach demonstrates the key point that invariability in aggregate metacommunity  
360 properties can mask compositional changes occurring from local to regional scales. In particular,  
361 we identified how community dynamics contributed to low aggregate variability at the  
362 metacommunity scale.

363 The relationship between compositional and aggregate variability across spatial scales  
364 reflects the underlying metacommunity processes that influence spatial synchrony of community  
365 trajectories. The degree of compositional spatial synchrony emerges from the combined effects  
366 of species interactions, dispersal, and environmental variation across space and time in the  
367 metacommunity (Amarasekare 2003, Leibold et al. 2004, Shoemaker and Melbourne 2016). For  
368 example, high dispersal rates can lead to increased spatial synchrony in composition that  
369 increases compositional metacommunity variability (Gouhier et al. 2010). Similarly, region-wide  
370 environmental forcing can also induce spatial synchrony in community dynamics (Steiner et al.  
371 2013). For example, if changes in local environmental conditions are similar across patches,  
372 local community composition might follow similar trajectories, leading to high compositional  
373 metacommunity variability (Figure 3A). This is probably the mechanism driving the  
374 metacommunity change observed in the case study of understory algae as the consistent  
375 replacement of the dominant species by a few sub-dominant species was linked to large-scale  
376 variations in sea surface temperature and nutrient concentration along the coast of California  
377 (Lamy et al. 2019). However, if environmental change is not strongly correlated in space, if  
378 dispersal is limited, or if community dynamics are largely stochastic, spatial compositional  
379 synchrony may be low, resulting in reduced compositional metacommunity variability (Figure  
380 3B; Micheli et al. 1999, Gonzalez and Loreau 2009). Metacommunity variability may also be  
381 reduced by relatively stable local environmental conditions (Figure 3C), or if local  
382 environmental conditions diverge and shift local community composition in opposite directions  
383 (Figure 3D). Thus, metacommunity variability may be stabilized by low-to-intermediate  
384 dispersal rates, low environmental variability over time, or spatially asynchronous environmental  
385 variability that reduce compositional spatial synchrony (Chalcraft 2013).

## 386 Diagnosing the effects of environmental change on aggregate variability

387 Scenarios in which aggregate metacommunity variability is unaccompanied by synchronous  
388 compositional changes may indicate the effects of external forcing. For example, community  
389 composition may be stable at local and metacommunity scales (e.g., Figure 3C), but aggregate  
390 properties of the metacommunity could be variable (e.g., Figure 1A). This situation could arise  
391 when community composition is unaffected by shifting environmental conditions, but some  
392 aspect of the environment (e.g., disturbance, climatic change) limits total biomass production  
393 uniformly across all species or differentially in a subset of vulnerable species. The net result  
394 would be a metacommunity with variability in an aggregate property (e.g., declining total  
395 biomass) despite little change in composition. In this scenario, the driver of aggregate  
396 metacommunity variability may be incorrectly attributed to spatial compositional synchrony, but  
397 our approach would eliminate this possible explanation, instead pointing to non-compositional  
398 changes that limit productivity and contribute to aggregate metacommunity variability.

399 When considering how environmental variables affect metacommunity variability (e.g.,  
400 via compositional changes or by acting directly on aggregate properties), it may be informative

401 to analyze the degree of spatial autocorrelation in environmental variation. For example, spatially  
402 autocorrelated environmental changes may increase metacommunity variability by increasing  
403 spatial aggregate and compositional synchrony. Any disturbance that increases the synchrony in  
404 environmental fluctuations across the landscape will destabilize communities at large spatial  
405 scales (Moran 1953). Therefore, the spatial scale of environmental fluctuations determines how  
406 many patches of the metacommunity are likely to be experiencing similar environmental  
407 conditions at any given time. This suggests a distinction between local-extent fluctuations and  
408 large-extent fluctuations, such that large-extent fluctuations may increase metacommunity  
409 variability more strongly than fluctuations at the local scale by inducing spatial synchrony in a  
410 larger portion of the metacommunity (Ruhi et al. 2018). Recent increases in large-extent  
411 disturbances (e.g., regional land use, global climate change; Foley et al. 2005), are especially  
412 troubling because they are more likely to synchronize variability among communities and  
413 destabilize metacommunities.

414 Our framework clarifies multiple scales of metacommunity variability and is thus  
415 relevant for conservation planners who are increasingly tasked with implementing local- and  
416 regional-scale strategies to minimize biodiversity loss (e.g., Gimona et al. 2012, Socolar et al.  
417 2016). While the importance of spatial processes (e.g. colonization–extinction and source–sink  
418 dynamics) for conservation planning has been widely acknowledged (Margules and Pressey  
419 2000), explicit use of the metacommunity concept has been rare, but effective. For example,  
420 application of the metacommunity framework to lowland heathland conservation showed that  
421 coordinated efforts among local sites could increase regional-scale conservation success (Diaz et  
422 al. 2013). In addition, this study recognized the importance of suboptimal patches for the  
423 maintenance of regional biodiversity, an aspect of conservation that is often overlooked, but  
424 would be important for identifying which and how many sites should be targeted for  
425 conservation (Socolar et al. 2016).

## 426 **Conclusions**

427 Metacommunity temporal variability has two complementary dimensions: aggregate and  
428 compositional. Partitioning aggregate and compositional variability across spatial scales yields a  
429 quantitative estimate of the degree of spatial aggregate synchrony and spatial compositional  
430 synchrony, thus facilitating the comparison between the two dimensions of community  
431 variability across spatial scales. Our framework links aggregate variability, based on previous  
432 work, and compositional variability across spatial scales to deepen our understanding of the  
433 mechanisms underlying metacommunity variability. Our marine metacommunity case study  
434 illustrates how the joint focus on aggregate and compositional variabilities reveals important  
435 compositional changes at broad spatial scales, mainly due to synchronous compositional  
436 trajectories among local communities, which would have been overlooked if the focus had been  
437 solely on the aggregate components of the metacommunity. Our approach contributes to relevant  
438 conservation and management issues by yielding insight into the ecological processes that may  
439 stabilize or destabilize aspects of biodiversity at large spatial scales.

## 440 **Acknowledgements**

441 This work was conducted as a part of the LTER Metacommunities Synthesis Group funded by  
442 the National Science Foundation under grant DEB#1545288, administered through the Long  
443 Term Ecological Research Network Office (LNO) at the National Center for Ecological Analysis  
444 and Synthesis, University of California, Santa Barbara. The National Ecological Observatory  
445 Network is a program sponsored by the National Science Foundation and operated under  
446 cooperative agreement by Battelle Memorial Institute. This material is based in part upon work  
447 supported by the National Science Foundation through the NEON Program. JDT is supported by  
448 a Rutherford Discovery Fellowship administered by the Royal Society Te Apārangi (RDF-18-  
449 UOC-007).

## 450 **Supplementary material**

451 SM1 (Supplementary material 1): Derivation of compositional variability for  $BD_\alpha^h$ ,  $BD_\gamma^h$ , and  
452  $BD_\phi^h$

453 SM2 (Supplementary material 2): R code to reproduce the example in Fig 2 is available at  
454 [https://github.com/sokole/ltermetacommunities/tree/master/Manuscripts/MS2-Supp-Info/supp-](https://github.com/sokole/ltermetacommunities/tree/master/Manuscripts/MS2-Supp-Info/supp-info-example-agg-by-site-rev20191121)  
455 [info-example-agg-by-site-rev20191121](https://github.com/sokole/ltermetacommunities/tree/master/Manuscripts/MS2-Supp-Info/supp-info-example-agg-by-site-rev20191121)

456

## 457 **Legend to Figures**

458  
459 **Figure 1.** Conceptual figure illustrating the dual nature of metacommunity variability. Each  
460 panel displays a scenario of low (C, D) and high (A, B) aggregate metacommunity variability  
461 and low (A, C) and high (B, D) compositional metacommunity variability. Scenarios are based  
462 on two local communities (community 1 and 2) composed of two species surveyed for 15 years  
463 (x-axis of inset panels). Within each local community, dashed red and blue lines represent the  
464 biomass of the two species, and the solid grey line represents the aggregate community property  
465 (total community biomass). At the metacommunity scale, dashed red and blue lines represent the  
466 metapopulation biomass of the two species, and the solid grey line the aggregate metacommunity  
467 property (the total biomass of the whole metacommunity).

468  
469 **Figure 2.** Case study of macroalgae that inhabit shallow rocky reefs (data package ID: knb-lter-  
470 sbc.50.7). Representation of the community structure of (A) the 10 local communities and (B)  
471 the metacommunity. Each color corresponds to one species. (C) Comparison of the partitioning  
472 of aggregate and compositional variability. Each color represents one of the three methods. (D)  
473 Compositional trajectories of each local community and the metacommunity based on NMDS.  
474 The compositional trajectory of the metacommunity is pictured as a thick black line and each  
475 color represents the compositional trajectory of one of the 10 local communities.

476  
477 **Figure 3.** Conceptual framework for integrating compositional metacommunity variability. Each  
478 sub-figure represents the temporal trajectory over nine time steps (from t1 to t9) of a  
479 metacommunity composed of two local communities (X and O) in a two-dimensional  
480 compositional space. We propose four conceptual scenarios for the compositional variability in a  
481 metacommunity. These scenarios are based on the original framework proposed by Micheli et al.  
482 (1999), but extended to scale compositional variability from local communities up to the regional  
483 scale. They correspond to (A) synchrony, (B) asynchrony, (C) stasis, and (D) compensation, and  
484 depend on the degree of local scale temporal compositional variability and spatial compositional  
485 synchrony. When the two local communities follow similar compositional trajectories, such  
486 strong spatial compositional synchrony increases regional-scale compositional variability  
487 (Scenario A: ‘synchrony’). Conversely, if the two local communities follow perfectly reverse  
488 compositional trajectories the metacommunity exhibits no compositional change (Scenario D:  
489 ‘compensation’). If the two local communities undergo weakly correlated compositional changes  
490 over time, the reduced spatial compositional synchrony partly reduces regional-scale  
491 compositional variability but, in contrast to scenario D, does not buffer it entirely (Scenario B:  
492 ‘asynchrony’). Finally, when the two local communities do not undergo any compositional  
493 change, the metacommunity compositional variability is also null (Scenario C: ‘stasis’).

494

495 **Table 1.** Glossary

---

| <b>Term</b>                     | <b>Definition</b>                                                                                                                                                                |
|---------------------------------|----------------------------------------------------------------------------------------------------------------------------------------------------------------------------------|
| Local scale                     | Local communities delimited within “patches” (or sites) within the metacommunity.                                                                                                |
| Regional scale                  | The collection of all local communities. Also referred to as the metacommunity.                                                                                                  |
| Metacommunity                   | A set of local communities connected by the dispersal of potentially interacting species.                                                                                        |
| Temporal variability            | The fluctuation in time of a given metric. Here, we focus on the temporal variability of both aggregate (e.g. total community biomass) and compositional metrics of communities. |
| Compositional variability       | Variability in time in the relative frequencies of the species that make up local communities or the whole metacommunity. Independent of aggregate variability.                  |
| Aggregate variability           | Temporal variability in the aggregate metric of a community or of the whole metacommunity (e.g. total community biomass).                                                        |
| Spatial aggregate synchrony     | The degree of synchrony in aggregate community metrics among local communities.                                                                                                  |
| Spatial compositional synchrony | The degree of synchrony in compositional change among local communities.                                                                                                         |
| Environmental synchrony         | The degree of synchrony in environmental change among local communities.                                                                                                         |

---

496

497 **Table 2.** Notations summary for aggregate and compositional metacommunity variability across  
 498 spatial scales. Temporal compositional variability is computed based on the time-independent  
 499 Hellinger transformation. Note that “.” are used to define sums (e.g.  $X_{it.} = \sum_j^s X_{itj}$ ) while  $\sqrt{\overline{X_{i.j}}} =$   
 500  $\sum_t \sqrt{X_{itj}}/n$  is the temporal mean of the square root coefficient biomass.

| Symbol                                                                              | Description                                                                                                                                                                                                                                                    |
|-------------------------------------------------------------------------------------|----------------------------------------------------------------------------------------------------------------------------------------------------------------------------------------------------------------------------------------------------------------|
| $X_{itj}$                                                                           | Biomass, or abundance, of species $j$ in community $i$ at time $t$                                                                                                                                                                                             |
| $X_{it.} = \sum_j^s X_{itj}$                                                        | Total aggregate metric of community $i$ at time $t$                                                                                                                                                                                                            |
| $X_{itj}^h = \sqrt{X_{itj}/X_{it.}}$                                                | Hellinger transformation of the biomass, or abundance, of species $j$ in community $i$ at time $t$ , corresponding to the square root coefficient of species relative                                                                                          |
| $X_{i..} = \sum_t^n \sum_j^s X_{itj}$                                               | Total aggregate metric of community $i$                                                                                                                                                                                                                        |
| $X_{itj}^{hT} = \sqrt{X_{itj}/X_{i..}}$                                             | Time-independent Hellinger transformation of the biomass, or abundance, of species $j$ in community $i$ at time $t$ , corresponding to the square root coefficient of species relative frequencies with respect to the total aggregate metric of community $i$ |
| <b>Local scale aggregate variability</b>                                            |                                                                                                                                                                                                                                                                |
| $\sigma_{Ti}$                                                                       | Temporal standard deviation of the aggregate metric in community $i$                                                                                                                                                                                           |
| $CV_{\alpha}^2 = \left( \frac{\sum_i^m \sigma_{Ti}}{\mu_{TT}} \right)^2$            | Local scale aggregate variability, defined as the square coefficient of the weighted average of aggregate variability across communities                                                                                                                       |
| <b>Local scale compositional variability</b>                                        |                                                                                                                                                                                                                                                                |
| $v_{ij}^{hT} = \frac{\sum_t^n (\sqrt{X_{itj}} - \sqrt{\overline{X_{i.j}}})^2}{n-1}$ | Temporal variance of the square root coefficient biomass of species $j$ in community $i$                                                                                                                                                                       |
| $BD_i^{hT} = \frac{\sum_j^s v_{ij}^{hT}}{X_{i..}}$                                  | Temporal compositional variability of community $i$ , corresponding to the beta diversity based on the time-independent Hellinger transformation of community $i$                                                                                              |
| $BD_{\alpha}^{hT} = \frac{\sum_i^m \sum_j^s v_{ij}^{hT}}{X_{...}}$                  | Local scale aggregate variability, defined as the weighted average of local compositional changes based on the time-independent Hellinger transformation                                                                                                       |
| <b>Regional scale aggregate variability</b>                                         |                                                                                                                                                                                                                                                                |
| $\sigma_{TT}$                                                                       | Temporal standard deviation of the aggregate metric of the whole metacommunity                                                                                                                                                                                 |
| $\mu_{TT}$                                                                          | Temporal mean of the aggregate metric of the whole metacommunity                                                                                                                                                                                               |
| $CV_{\gamma}^2 = \left( \frac{\sigma_{TT}}{\mu_{TT}} \right)^2$                     | Regional scale aggregate variability, or aggregate variability of the whole metacommunity                                                                                                                                                                      |
| <b>Regional scale compositional variability</b>                                     |                                                                                                                                                                                                                                                                |
| $X_{.tj} = \sum_i^m X_{itj}$                                                        | Total aggregate metric of species $j$ at time $t$ in the whole metacommunity                                                                                                                                                                                   |
| $X_{.j} = \sum_i^m \sum_t^n X_{itj}$                                                | Total aggregate metric of species $j$ in the whole metacommunity                                                                                                                                                                                               |
| $X_{...} = \sum_i^m \sum_t^n \sum_j^s X_{itj}$                                      | Total aggregate metric of the whole metacommunity                                                                                                                                                                                                              |
| $v_{Tj}^{hT} = \frac{\sum_t^n (\sqrt{X_{.tj}} - \sqrt{\overline{X_{.j}}})^2}{n-1}$  | Temporal variance of the square root coefficient of the regional biomass of species $j$                                                                                                                                                                        |
| $BD_{\gamma}^{hT} = \frac{\sum_{j=1}^s v_{Tj}^{hT}}{X_{...}}$                       | Regional scale compositional variability, or compositional variability of the whole metacommunity, corresponding to the beta diversity based on the time-independent Hellinger transformation of the whole metacommunity                                       |



### Spatial aggregate and compositional synchrony

---

$$\phi = \left( \frac{\sigma_{TT}}{\sum_i^m \sigma_{Ti}} \right)^2$$

Spatial aggregate synchrony, defined following Wang and Loreau (2014) and the synchrony definition of Loreau and de Mazancourt (2008)

$$\phi_{(j)}^{hT} = \frac{v_{Tj}^{hT}}{\sum_i^m v_{ij}^{hT}}$$

Species-level spatial synchrony, defined as the spatial synchrony of the square root coefficient of the biomass of species  $j$ . This synchrony index differs from the definition of Loreau and de Mazancourt (2008). Instead of the ratio between the total variance over the square coefficient of the summed standard deviations, we here use the ratio between the total variance over the sum of local variances

$$BD_{\phi}^{hT} = \sum_{j=1}^s w_j \cdot \phi_{(j)}^{hT}, \text{ where } w_j = \frac{\sum_i^m v_{ij}^{hT}}{\sum_{j=1}^s \sum_{i=1}^m v_{ij}^{hT}}$$

Spatial compositional synchrony, corresponding to weighted average of species-level spatial synchrony. Different from the synchrony definition of Loreau and de Mazancourt (2008)

---

## 502 Literature cited

- 503 Adler, P. B. et al. 2005. Evidence for a general species–time–area relationship. - *Ecology* 86:  
504 2032–2039.
- 505 Amarasekare, P. 2003. Competitive coexistence in spatially structured environments: a synthesis.  
506 - *Ecol. Lett.* 6: 1109–1122.
- 507 Anderson, M. J. et al. 2011. Navigating the multiple meanings of  $\beta$  diversity: a roadmap for the  
508 practicing ecologist. - *Ecol. Lett.* 14: 19–28.
- 509 Brown, B. L. et al. 2016. Compensatory dynamics stabilize aggregate community properties in  
510 response to multiple types of perturbations. - *Ecology* 97: 2021–2033.
- 511 Chalcraft, D. R. 2013. Changes in ecological stability across realistic biodiversity gradients  
512 depend on spatial scale. - *Glob. Ecol. Biogeogr.* 22: 19–28.
- 513 Chase, J. M. 2010. Stochastic community assembly causes higher biodiversity in more  
514 productive environments. - *Science* 328: 1388–1391.
- 515 De Cáceres, M. et al. 2019. Trajectory analysis in community ecology. - *Ecol. Monogr.* 89:  
516 e01350.
- 517 Diaz, A. et al. 2013. Conservation implications of long-term changes detected in a lowland heath  
518 plant metacommunity. - *Biol. Conserv.* 167: 325–333.
- 519 Donohue, I. et al. 2013. On the dimensionality of ecological stability. - *Ecol. Lett.* 16: 421–429.
- 520 Foley, J. A. et al. 2005. Global consequences of land use. - *Science* 309: 570–4.
- 521 Gimona, A. et al. 2012. Woodland networks in a changing climate: Threats from land use  
522 change. - *Biol. Conserv.* 149: 93–102.
- 523 Gonzalez, A. and Loreau, M. 2009. The causes and consequences of compensatory dynamics in  
524 ecological communities. - *Annu. Rev. Ecol. Evol. Syst.* 40: 393–414.
- 525 Gouhier, T. C. et al. 2010. Synchrony and stability of food webs in metacommunities. - *Am. Nat.*  
526 175: E16–E34.
- 527 Grimm, V. and Wissel, C. 1997. Babel, or the ecological stability discussions: An inventory and  
528 analysis of terminology and a guide for avoiding confusion. - *Oecologia* 109: 323–334.
- 529 Harrer, S. L. et al. 2013. Patterns and controls of the dynamics of net primary production by  
530 understory macroalgal assemblages in giant kelp forests. - *J. Phycol.* 49: 248–257.
- 531 Hillebrand, H. et al. 2010. Warming leads to higher species turnover in a coastal ecosystem. -  
532 *Glob. Change Biol.* 16: 1181–1193.
- 533 Hughes, B. B. et al. 2017. Long-term studies contribute disproportionately to ecology and policy.  
534 - *BioScience* 67: 271–281.
- 535 Ives, A. R. and Carpenter, S. R. 2007. Stability and diversity of ecosystems. - *Science* 317: 58–  
536 62.
- 537 Jost, L. et al. 2011. Compositional similarity and  $\beta$  diversity. - In: Magurran, A. E. and McGill,  
538 B. J. (eds), *Biological diversity: frontiers in measurement and assessment*. Oxford  
539 University Press, pp. 66–84.
- 540 Lamy, T. et al. 2015. Understanding the spatio-temporal response of coral reef fish communities  
541 to natural disturbances: insights from beta-diversity decomposition. - *PLOS ONE* 10:  
542 e0138696.
- 543 Lamy, T. et al. 2019. Species insurance trumps spatial insurance in stabilizing biomass of a  
544 marine macroalgal metacommunity. - *Ecology* 100: e02719.

- 545 Legendre, P. 2014. Interpreting the replacement and richness difference components of beta  
546 diversity. - *Glob. Ecol. Biogeogr.* 23: 1324–1334.
- 547 Legendre, P. 2019. A temporal beta-diversity index to identify sites that have changed in  
548 exceptional ways in space–time surveys. - *Ecol. Evol.* 9: 3500–3514.
- 549 Legendre, P. and Gallagher, E. D. 2001. Ecologically meaningful transformations for ordination  
550 of species data. - *Oecologia* 129: 271–280.
- 551 Legendre, P. and Legendre, L. 2012. *Numerical Ecology*. - Elsevier.
- 552 Legendre, P. and De Cáceres, M. 2013. Beta diversity as the variance of community data:  
553 dissimilarity coefficients and partitioning. - *Ecol. Lett.* 16: 951–963.
- 554 Leibold, M. A. and Chase, J. M. 2018. *Metacommunity ecology*. - Princeton University Press.
- 555 Leibold, M. A. et al. 2004. The metacommunity concept: a framework for multi-scale  
556 community ecology. - *Ecol. Lett.* 7: 601–613.
- 557 Loreau, M. and de Mazancourt, C. 2008. Species synchrony and its drivers: neutral and  
558 nonneutral community dynamics in fluctuating environments. - *Am. Nat.* 172: E48–E66.
- 559 Loreau, M. et al. 2003. Biodiversity as spatial insurance in heterogeneous landscapes. - *Proc.*  
560 *Natl. Acad. Sci.* 100: 12765–12770.
- 561 MacArthur, R. 1955. Fluctuations of animal populations and a measure of community stability. -  
562 *Ecology* 36: 533–536.
- 563 Magurran, A. E. et al. 2018. Divergent biodiversity change within ecosystems. - *Proc. Natl.*  
564 *Acad. Sci.* 115: 1843–1847.
- 565 Margules, C. R. and Pressey, R. L. 2000. Systematic conservation planning. - *Nature* 405: 243–  
566 253.
- 567 May, R. M. 1973. *Stability and complexity in model ecosystems*. - Princeton University Press.
- 568 Micheli, F. et al. 1999. The dual nature of community variability. - *Oikos* 85: 161–169.
- 569 Moran, P. A. P. 1953. The statistical analysis of the Canadian Lynx cycle. - *Aust. J. Zool.* 1:  
570 291–298.
- 571 Oliver, T. et al. 2010. Heterogeneous landscapes promote population stability. - *Ecol. Lett.* 13:  
572 473–484.
- 573 Orloci, L. 1967. An agglomerative method for classification of plant communities. - *J. Ecol.* 55:  
574 193–206.
- 575 Rao, C. R. 1995. A review of canonical coordinates and an alternative to correspondence  
576 analysis using Hellinger distance. - *Quèstiió Quad. Estad. Investig. Oper.* 19: 22–63.
- 577 Record, S. et al. 2021. Novel insights to be gained from applying metacommunity theory to long-  
578 term, spatially replicated biodiversity data. - *Front. Ecol. Evol.* 8: 612794.
- 579 Reed, D. C. 2018. SBC LTER: Reef: Annual time series of biomass for kelp forest species,  
580 ongoing since 2000. Environmental Data Initiative.  
581 <https://doi.org/10.6073/pasta/d5fd133eb2fd5bea885577caaf433b30>.
- 582 Ruhi, A. et al. 2018. Detrimental effects of a novel flow regime on the functional trajectory of an  
583 aquatic invertebrate metacommunity. - *Glob. Change Biol.* 24: 3749–3765.
- 584 Shoemaker, L. G. and Melbourne, B. A. 2016. Linking metacommunity paradigms to spatial  
585 coexistence mechanisms. - *Ecology* 97: 2436–2446.
- 586 Socolar, J. B. et al. 2016. How should beta-diversity inform biodiversity conservation? - *Trends*  
587 *Ecol. Evol.* 31: 67–80.
- 588 Steiner, C. F. et al. 2013. Population synchrony and stability in environmentally forced  
589 metacommunities. - *Oikos* 122: 1195–1206.

- 590 Tilman, D. 1999. The ecological consequences of changes in biodiversity: a search for general  
591 principles. - *Ecology* 80: 1455–1474.
- 592 Tuomisto, H. 2010a. A diversity of beta diversities: Straightening up a concept gone awry. Part  
593 1. Defining beta diversity as a function of alpha and gamma diversity. - *Ecography* 33: 2–  
594 22.
- 595 Tuomisto, H. 2010b. A diversity of beta diversities: Straightening up a concept gone awry. Part  
596 2. Quantifying beta diversity and related phenomena. - *Ecography* 33: 23–35.
- 597 Wang, S. and Loreau, M. 2014. Ecosystem stability in space:  $\alpha$ ,  $\beta$  and  $\gamma$  variability. - *Ecol. Lett.*  
598 17: 891–901.
- 599 Wang, S. and Loreau, M. 2016. Biodiversity and ecosystem stability across scales in  
600 metacommunities. - *Ecol. Lett.* 19: 510–518.
- 601 Wang, S. et al. 2017. An invariability-area relationship sheds new light on the spatial scaling of  
602 ecological stability. - *Nat. Commun.* 8: 15211.
- 603 Wang, S. et al. 2019. Stability and synchrony across ecological hierarchies in heterogeneous  
604 metacommunities: linking theory to data. - *Ecography* 42: 1200–1211.
- 605 Wang, S. et al. 2021. Biotic homogenization destabilizes ecosystem functioning by decreasing  
606 spatial asynchrony. - *Ecology*: e03332.
- 607 Whittaker, R. H. 1952. A study of summer foliage insect communities in the Great Smoky  
608 Mountains. - *Ecol. Monogr.* 22: 2–44.
- 609 Wilcox, K. R. et al. 2017. Asynchrony among local communities stabilises ecosystem function of  
610 metacommunities. - *Ecol. Lett.* 20: 1534–1545.
- 611 Wolda, H. 1981. Similarity indices, sample size and diversity. - *Oecologia* 50: 296–302.
- 612 Yachi, S. and Loreau, M. 1999. Biodiversity and ecosystem productivity in a fluctuating  
613 environment: the insurance hypothesis. - *Proc. Natl. Acad. Sci. U. S. A.* 96: 1463–1468.  
614

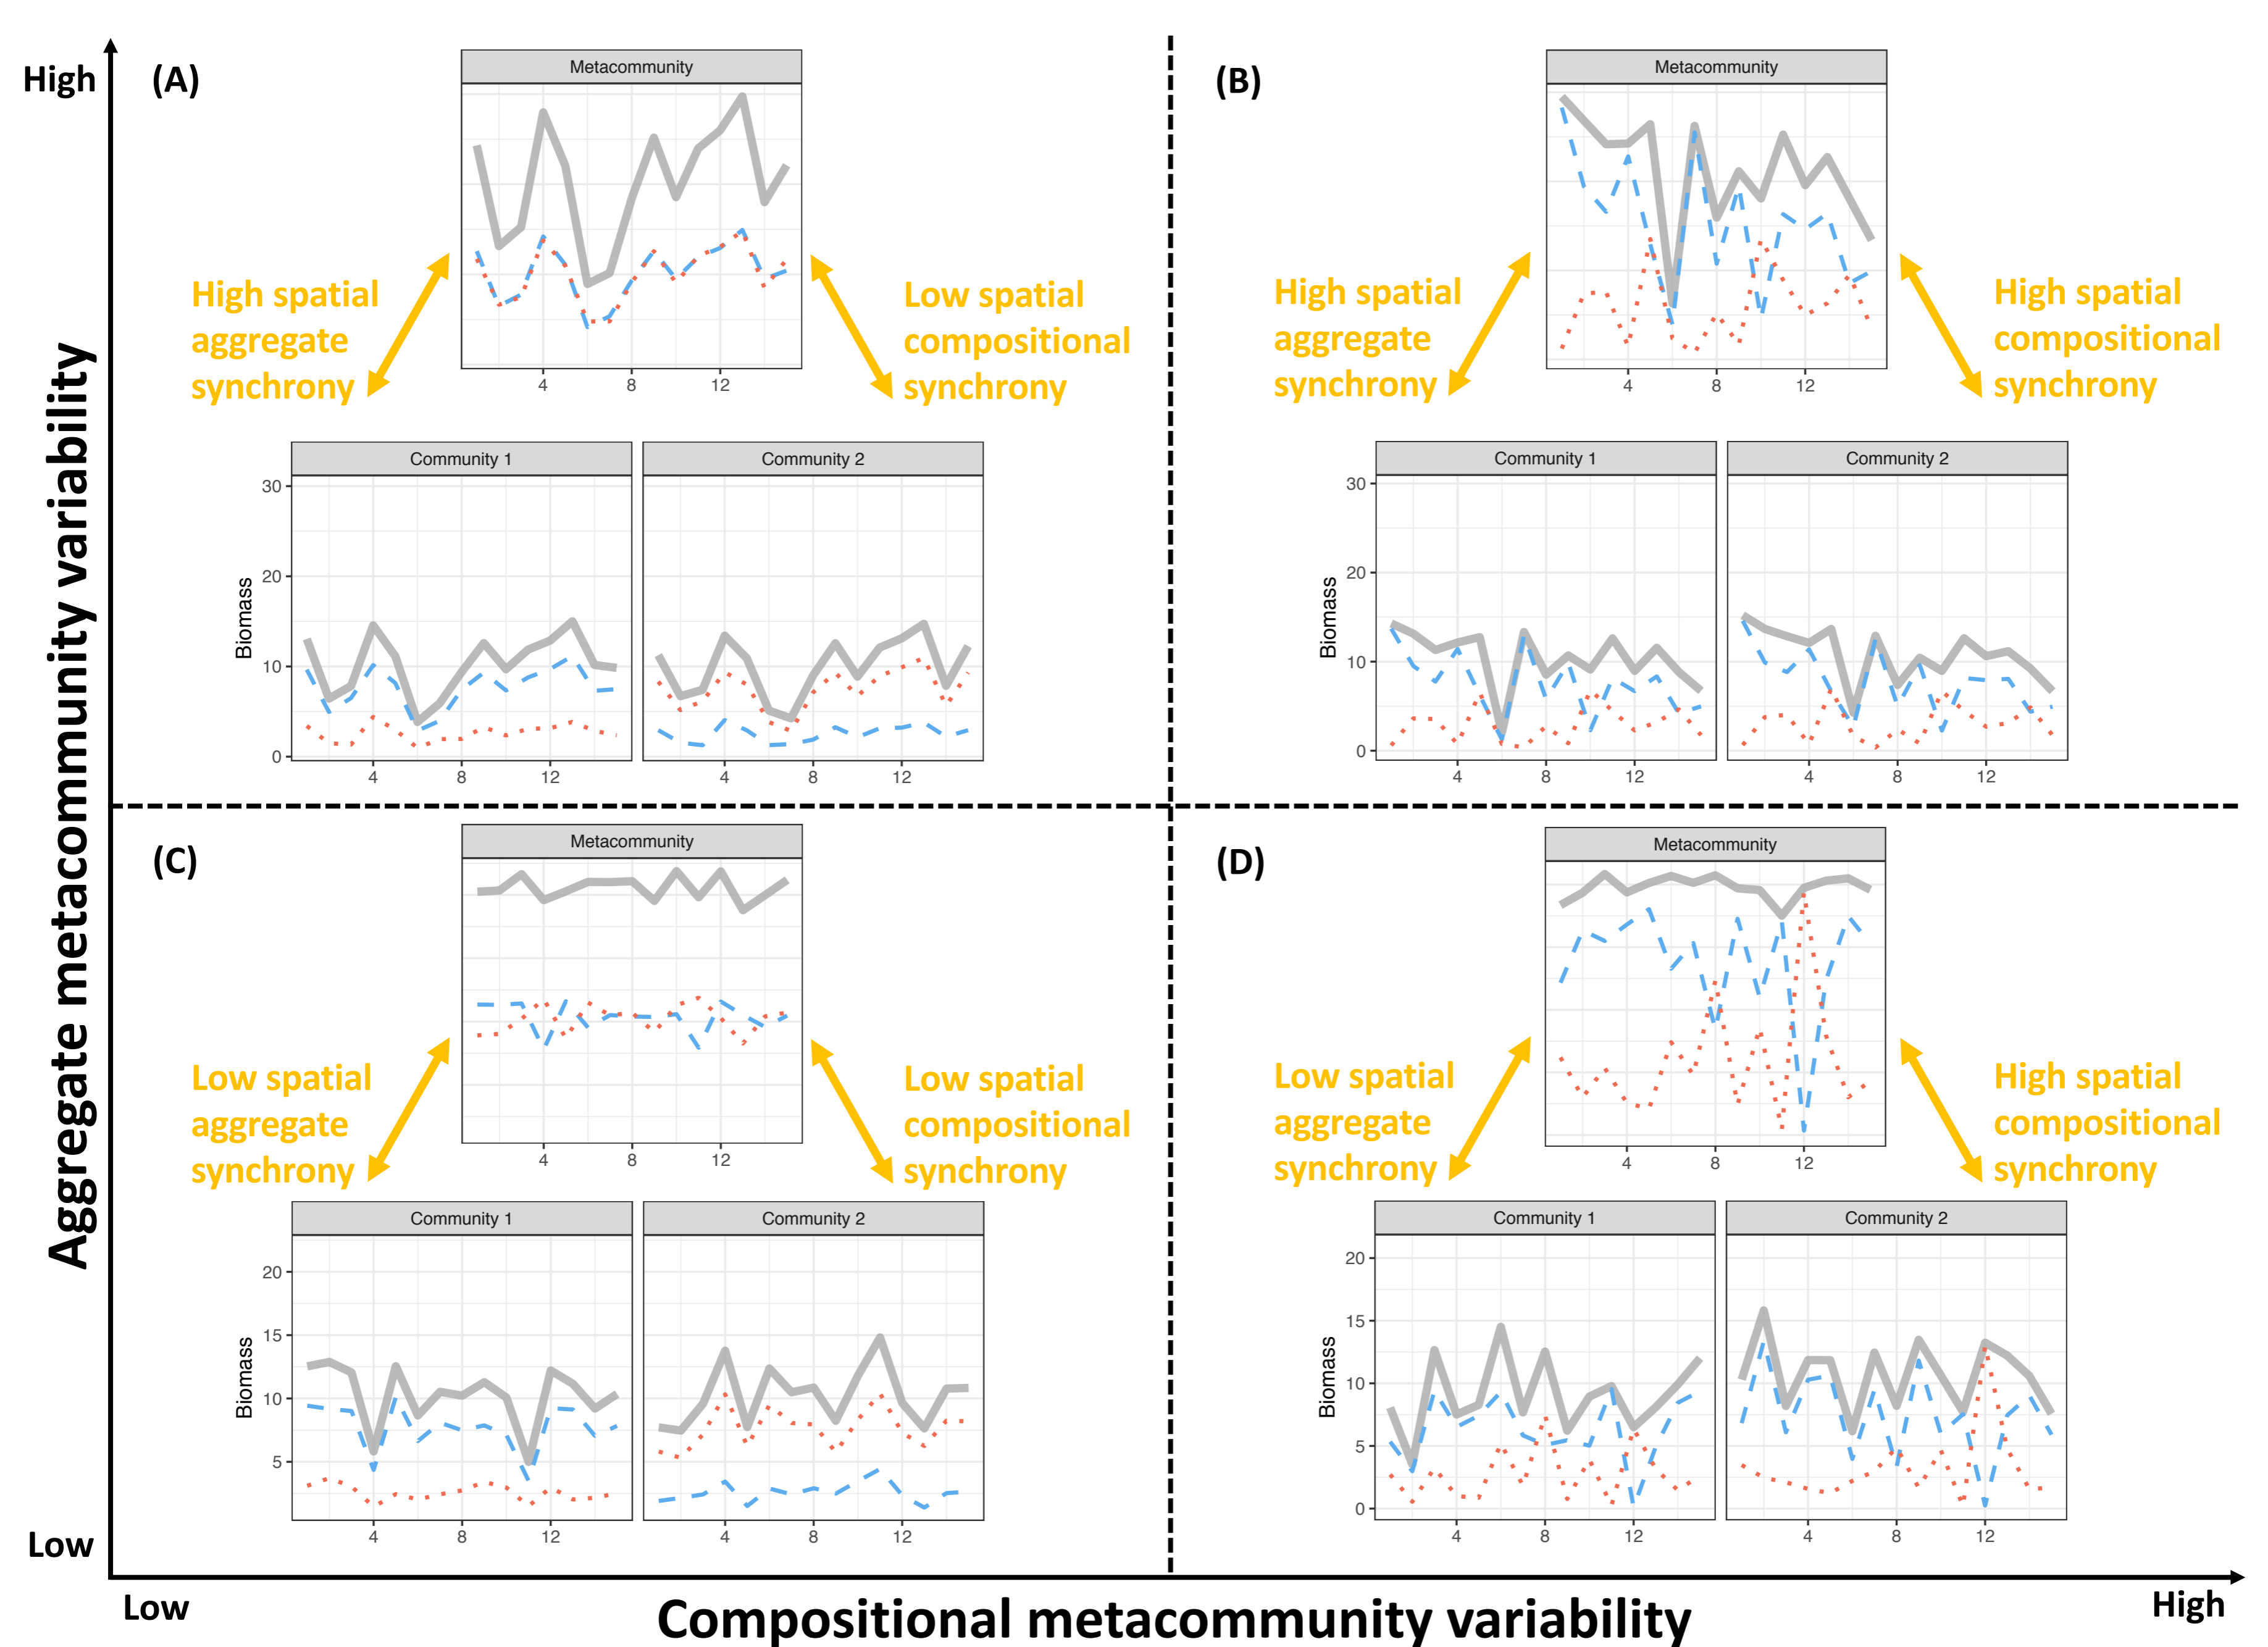

## (A) Local communities

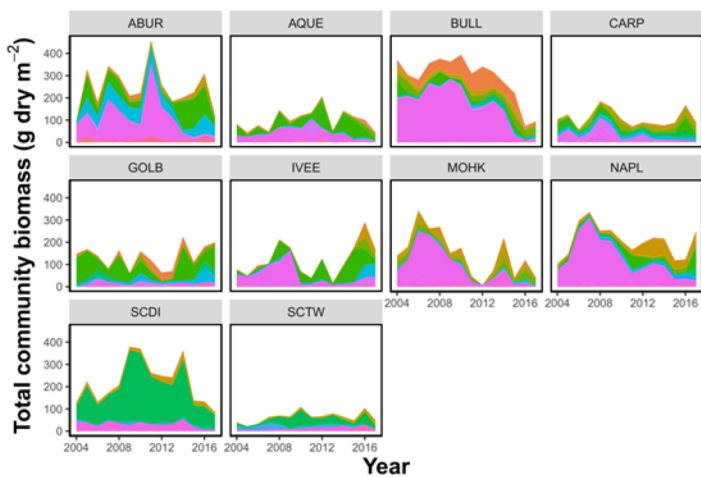

## (B) Metacommunity

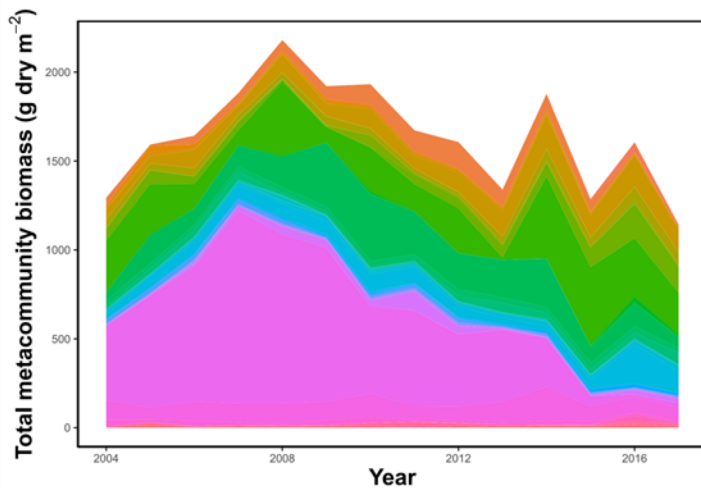

## (C) Variability partitioning

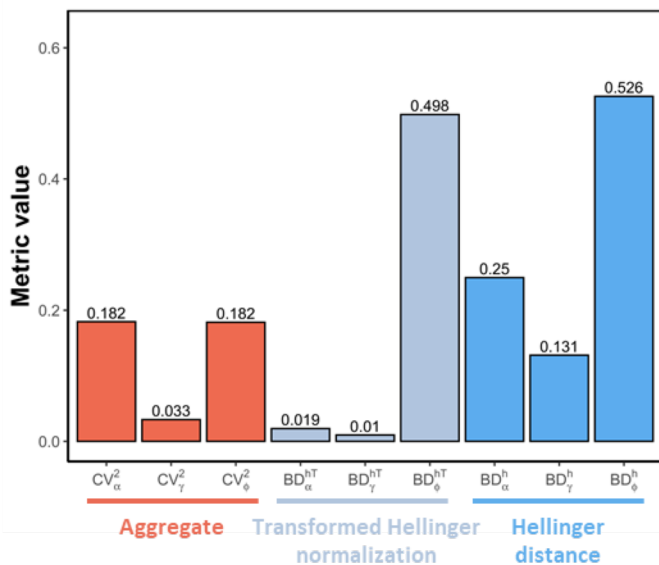

## (D) NMDS (stress = 0.17)

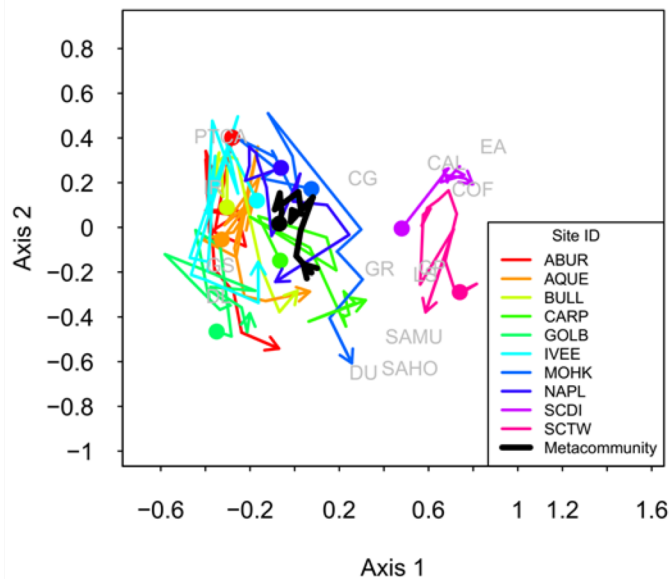

HIGH  
 Compositional metacommunity  
 variability (temporal)  
 LOW

### Synchrony

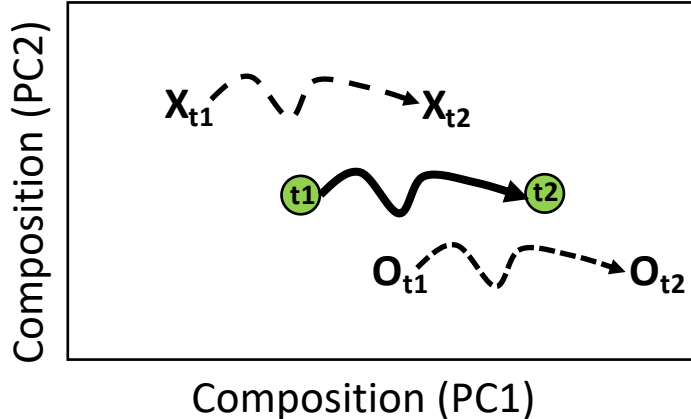

### Asynchrony

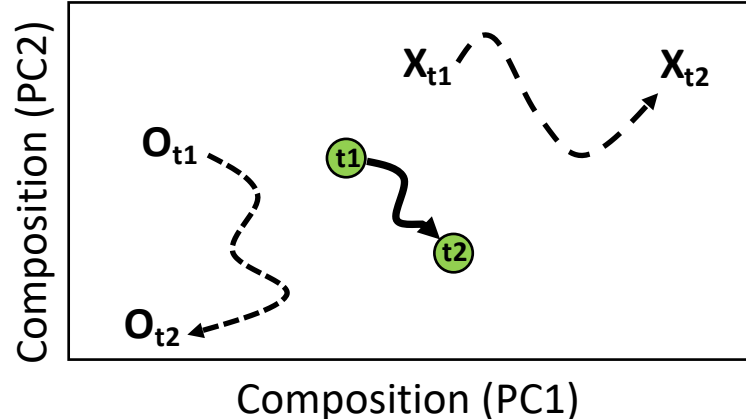

### Stasis

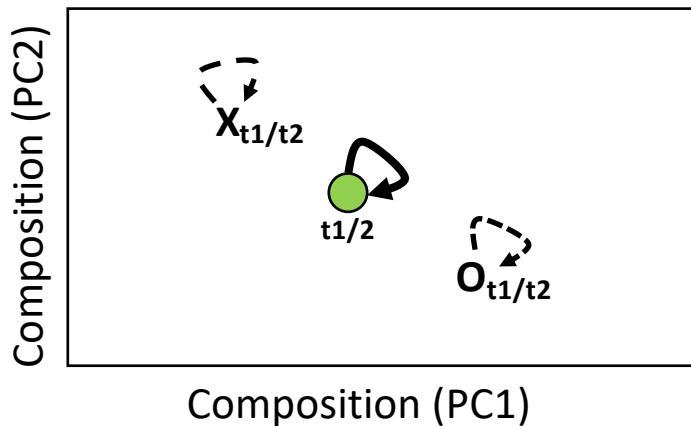

### Compensation

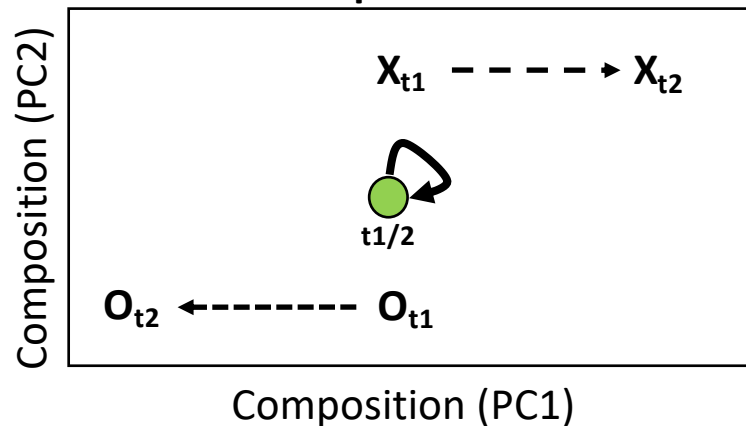

LOW

Compositional variability among local  
 communities through time (spatial)

HIGH

- Total Metacommunity
- Patch 1 **X**
- Patch 2 **O**
